# Supplementary material for: Dyslipidemia, Obesity, and Ethnicity in Mexican Children
Source: MDPI journal article supplement (doi:10.3390/ijerph182312659), 2021-12-01
Supplement: s1 [file s1]

Table S1. **The ability of body fat percentage to discriminate lipid disorder.** Areas under the ROC curve (AUCs), 95% confidence intervals and p-values (P) for cardiometabolic risk factors in school children from Mexico City (Central Mexico).

|              | AUC (95%CI), P            | P <sup>1</sup> |
|--------------|---------------------------|----------------|
| High TG      | 0.71(0.65-0.76), < 0.0001 | 0.062          |
| High TC      | 0.57(0.51-0.63), 0.017    | 0.022          |
| Low HDL      | 0.70(0.63-0.77), < 0.0001 | 0.002          |
| High LDL     | 0.61(0.55-0.68), 0.001    | 0.113          |
| Low ApoA1    | 0.51(0.40-0.62), 0.870    | 0.065          |
| High ApoB    | 0.64(0.57-0.69), 0.010    | 0.008          |
| Dyslipidemia | 0.68(0.61-0.75), 0.0001   | 0.734          |

Triglycerides (TG, mg/dL), Total cholesterol (TC, mg/dL), high density lipoprotein, (HDL in mg/dl), low density lipoprotein, (LDL in mg/dl), apolipoprotein A1, (ApoA, mg/dl), apolipoprotein B, (ApoB mg/dl). Lipids levels classification were according to the borderline-high criteria of the Expert Panel on Integrated Guidelines for Cardiovascular Health and Risk Reduction in Children and Adolescents National Heart, Lung and Blood Institute. P-value (P<sup>1</sup>) resulted from Z test from de body mass index and BFP AUCs pairwise comparisons.

Table S2. **Results of lipid disorder association analysis with obesity.** Obesity (OB), Body Fat Percentage (BFP) school children from Mexico City. Estimate, standard errors (SE), p-value (p), odd ratio (OR) and 95% confidence intervals and p-values (P).

| <b>HighTG</b>       | <b>Estimate</b> | <b>z</b> | <b>OR</b> | <b>95%CI</b> | <b>P</b> |
|---------------------|-----------------|----------|-----------|--------------|----------|
| Int                 | -0.014          | -0.085   |           |              | 0.930    |
| BFP-OB              | 1.329           | 5.405    | 3.78      | (2.34-6.16)  | <0.001   |
| <b>High TC</b>      |                 |          |           |              |          |
| Intercept           | -0.158          | -0.932   |           |              | 0.350    |
| BFP-OB              | 0.555           | 2.46     | 1.74      | (1.12-2.71)  | 0.014    |
| <b>Low HDL</b>      |                 |          |           |              |          |
| Intercept           | -3.319          | -5.752   |           |              | <0.001   |
| BFP-OB              | 1.353           | 3.796    | 3.4       | (1.77-6.98)  | 0.001    |
| <b>High LDL</b>     |                 |          |           |              |          |
| Intercept           | -1.517          | -6.871   |           |              | <0.001   |
| BFP-OB              | 0.871           | 3.243    | 2.39      | (1.42- 4.10) | 0.001    |
| <b>Low APOA1</b>    |                 |          |           |              |          |
| Intercept)          | 2.359           | 7.812    |           |              | <0.001   |
| BFP-OB              | 0.021           | 0.054    | 1.02      | (0.46- 2.22) | 0.960    |
| <b>High APOB</b>    |                 |          |           |              |          |
| Intercept           | -1.089          | -5.573   |           |              | <0.001   |
| BFP-OB              | 0.844           | 3.457    | 2.32      | (1.45-3.79)  | <0.0001  |
| <b>Dyslipidemia</b> |                 |          |           |              |          |
| Intercept           | 1.862           | 3.181    |           |              | 0.002    |
| Age                 | -0.119          | -1.874   | 0.88      | (0.78-1.00)  | 0.060    |
| BFP-OB              | 1.438           | 4.6      | 4.21      | (2.31-7.92)  | <0.001   |

Lipids levels classification were according to the borderline-high criteria of the Expert Panel on Integrated Guidelines for Cardiovascular Health and Risk Reduction in Children and Adolescents National Heart, Lung and Blood Institute.
